# Supplementary material for: Non-covalent dyes in microscale thermophoresis for studying RNA ligand interactions and modifications
Source: Royal Society of Chemistry journal article supplement (doi:10.1039/d3sc02993j), 2023-01-01
Supplement: d3sc02993j1.pdf [file d3sc02993j1.pdf]

## Non-covalent Dyes in Microscale Thermophoresis for Studying RNA Ligand Interactions and Modifications

Elisabeth Kallert,<sup>[a]</sup> Malte Behrendt,<sup>[a]</sup> Ariane Frey,<sup>[a]</sup> Christian Kersten,<sup>[a]</sup> Fabian Barthels\*<sup>[a]</sup>

[a] E. Kallert, M. Behrendt, A. Frey, Dr. C. Kersten, Dr. F. Barthels  
Institute of Pharmaceutical and Biomedical Sciences  
Johannes Gutenberg-University of Mainz  
Staudingerweg 5, 55128 Mainz, Germany  
E-mail: barthels@uni-mainz.de

### RNA and DNA oligo sequences

**Table S1.** Oligos used for RNA-MST experiments. **Category 1:** no structure, <10mer; **category 2:** no structure, 10–15mer; **category 3:** no structure, 16–20mer; **category 4:** hairpin, 16–20mer; **category 5:** bulge/internal loop + hairpin, 21–25mer; **category 6:** internal loop + hairpin, 26–30mer; **category 7:** bulge + internal loop + hairpin(s), 31–50mer; **category 8:** 2 internal loops + 1 hairpin, 50mer; **category 9:** 3 internal loops + 1 hairpin, 60mer; **category 10:** various functional RNA.

| OligoID       | Cat. | RNA sequence                                                     | Manufacturer |
|---------------|------|------------------------------------------------------------------|--------------|
| <b>MH993</b>  | 1    | GUUAUUC                                                          | Iba          |
| <b>MH996</b>  | 1    | UUUUUUUU                                                         | Biomers      |
| <b>MH474</b>  | 1    | GGUACCCAA                                                        | Iba          |
| <b>MH122</b>  | 2    | ACAGCUAUCCAUUG                                                   | Iba          |
| <b>MH847</b>  | 2    | UCUGAGGGUCCAGGG                                                  | Biomers      |
| <b>MH268</b>  | 2    | CCCGGUAUUCGCAUA                                                  | Salifu       |
| <b>MH266</b>  | 3    | AAACUAAAACUUUACUGU                                               | Salifu       |
| <b>MH907</b>  | 3    | ACAAGAAGGGUUUGAUCAUC                                             | Iba          |
| <b>MH272</b>  | 3    | AGAAAUUGUCUGAUAAA                                                | Salifu       |
| <b>MH355</b>  | 4    | CGCGGGAGACCGGGUUCGA                                              | Dharmacon    |
| <b>MH261</b>  | 4    | GCUUGAAACCAGCUUUGGG                                              | Salifu       |
| <b>MH1428</b> | 4    | GGAUCCUCUAGAGUCGACCU                                             | Idt          |
| <b>MH515</b>  | 5    | GGUGGGUUUCCGAGCGCCAAAG                                           | Iba          |
| <b>MH499</b>  | 5    | GUUCGAUCCACAGAAUUCGCACCA                                         | Biomers      |
| <b>MH649</b>  | 5    | GGUUCGAUUCGCGGAGGCCA                                             | Iba          |
| <b>MH857</b>  | 6    | UCUAGAGGAUCCCGGUACCGAGCUC                                        | Biomers      |
| <b>MH876</b>  | 6    | UGCCGCCGUCUUGAAACCGACCAAGGA                                      | Iba          |
| <b>MH1145</b> | 6    | AACUUAUUGUUUUGCAUUGGACUUUGAGUUA                                  | Iba          |
| <b>MH761</b>  | 7    | GGCGUGUAGGAUUAUUAUACCAUCCAGAUCCGCGG                              | Iba          |
| <b>MH646</b>  | 7    | UCCUCGUUAGUAUAGUGGUGAUUCCCGCCUAUAUC                              | Iba          |
| <b>MH566</b>  | 7    | GUCACGCGGGAGACCGGGUUCGAUUCGCGGAGGCCA                             | Iba          |
| <b>MH723</b>  | 8    | CCGCGAUCUGGAGAGGUGAAGAAUACGACCACCUACAAGAAGGACACGCC               | Iba          |
| <b>MH721</b>  | 8    | CCGCGAUCUGGAGAGGUGAAGAAUACGACCACCUAAGAAGGACACGCC                 | Iba          |
| <b>MH762</b>  | 8    | CCGCGAUCUGGAGAGGUGAAGAAUUCGACCACCUACCAGAAGGACACGCC               | Iba          |
| <b>MH950</b>  | 9    | CGGAGCCAGCGAGUCUAACCUUGGCCGAGAGGUCUUGGUAUUCUUGUGAAACUC<br>CGUCGU | Iba          |

|                                                                                |    |                                                                                                           |                   |
|--------------------------------------------------------------------------------|----|-----------------------------------------------------------------------------------------------------------|-------------------|
| <b>MH952</b>                                                                   | 9  | GGCCUCAGGAUCUGCUUAGAGAAGGGGGCAACUCCAUCUCAGAGCGGAGAAUUU<br>GGACAA                                          | Iba               |
| <b>MH953</b>                                                                   | 9  | UCUUGGAUUUAUUGAAGCUAACUACUGCGAAAGCAUUUGCCAAGGACGUUUUC<br>AUUAAU                                           | Iba               |
| <b>tRNA<sup>Asp</sup></b>                                                      | 10 | UCCUCGUUAGUAGUGGGUAGUAUCCCGCCUGUCACGCGGGAGACCGGGGUU<br>CGAUUCCCCGACGGGGAG                                 | In house IVT      |
| <b>PreQ<sub>1</sub> RS</b><br>( <i>Thermoanaerobac<br/>ter tengcongensis</i> ) | 10 | GGAGAGGUUCUAGCUACACCUCUAUAAAAACUAA                                                                        | biomers           |
| <b>SAM-I RS</b><br>( <i>Thermoanaerobac<br/>ter tengcongensis</i> )            | 10 | GGCUUAUCAAGAGAGGGGGAGCGACUGGCGCGAAGAACCCCGCAACCAGAAU<br>GGUGCCAAUUCUGCAGCGGAAACGUUGAAAGAUAGCCG            | In house IVT      |
| <b>SAM-VI RS</b><br>( <i>Bifidobacterium<br/>angulatum</i> )                   | —  | GGCAUUGUGCCUCGCAUUGCACCUCGCGGGGCGAUAAAGUCCUGAAAAGGGGAUGU<br>C                                             | In house IVT      |
| <b>Cy5-PreQ<sub>1</sub><br/>RS</b><br>( <i>Bacillus subtilis</i> )             | —  | Cy5-AGAGGUUCUAGCUACACCUCUAUAAAAACUAA                                                                      | Eurofins Genomics |
| <b>Cy5-SAM-VI<br/>RS</b><br>( <i>Bifidobacterium<br/>angulatum</i> )           | —  | Cy5-<br>GGCAUUGUGCCUCGCAUUGCACCUCGCGGGGCGAUAAAGUCCUGAAAAGGGGAUGU<br>C                                     | Eurofins Genomics |
| <b>AdoCbl<br/>riboswitch</b><br>(Marine<br>metagenome <i>env8</i><br>4WJvar)   | —  | GGCCUGAAAGCGUGGGGGAAGUGACGUGAAAUUCGUCCAGAUUACUUGAUAC<br>GGUUUAUACUCCGAGUGCCACCCAGGCCAUACAACGAGCAAGGAGACUC | GenScript         |
| <b>Fluoride<br/>riboswitch</b><br>( <i>Thermotoga<br/>petrophila</i> )         | —  | GGGCGAUGAGGCCCGCCCAACUGCCUGAAAAGGGCUGAUGGCCUCUACUG                                                        | GenScript         |
| <b>Neomycin<br/>aptamer</b><br>(synthetic)                                     | —  | GGCUGCUUGUCCUUUAAUGUCCAGUC                                                                                | GenScript         |
| <b>METTL3/14<br/>substrate</b>                                                 | —  | AACUUAAGUUGCAUUGGACUUGAGUUA                                                                               | Iba               |

---

**Table S2.** DNA templates and primers used for PCR and IVT.

| <b>OligoID</b> | <b>description</b>                       | <b>DNA sequence</b>                                                                                               | <b>Manufacturer</b> |
|----------------|------------------------------------------|-------------------------------------------------------------------------------------------------------------------|---------------------|
| <b>MH53</b>    | Universal<br>forward<br>primer           | CGCGCGAAGCTTAATACGACTCACTATA                                                                                      | IDT                 |
| <b>EK0004</b>  | Reverse<br>primer<br>SAM-I RS            | CGGCTCATCTTTCAACGTTTCCG                                                                                           | IDT                 |
| <b>EK0010</b>  | Reverse<br>primer<br>SAM-VI RS           | GACATCCCTTTTCAGGACTTATCGCCCCG                                                                                     | IDT                 |
| <b>MH1102</b>  | Reverse<br>primer<br>tRNA <sup>Asp</sup> | TGGCGGGCCGTCG                                                                                                     | Iba                 |
| <b>EK0003</b>  | Template<br>SAM-I RS                     | CGGCTCATCTTTCAACGTTTCCGCTGCAGGAATTGGCACCATTCTGGTTGCCGGGGTTCTTC<br>GCGCCAGTCGCTCCCCCTCTTTGATAAGCCTATAGTGAGTCGTATTA | IDT                 |
| <b>EK0009</b>  | Template<br>SAM-VI RS                    | GACATCCCTTTTCAGGACTTATCGCCCCGCGGAGTGCAATGCGAGGCACAATGCCTATAGT<br>GAGTCGTATTA                                      | IDT                 |
| <b>MH1101</b>  | Template<br>tRNA <sup>Asp</sup>          | TGGCGGGCCGTCGGGGAATCGAACCCCGGTCTCCCGCTGACAGGCGGGGATACTACCA<br>CTATACTAACGACCCTATAGTGAGTCGTATT                     | Iba                 |

## Supplementary Figures

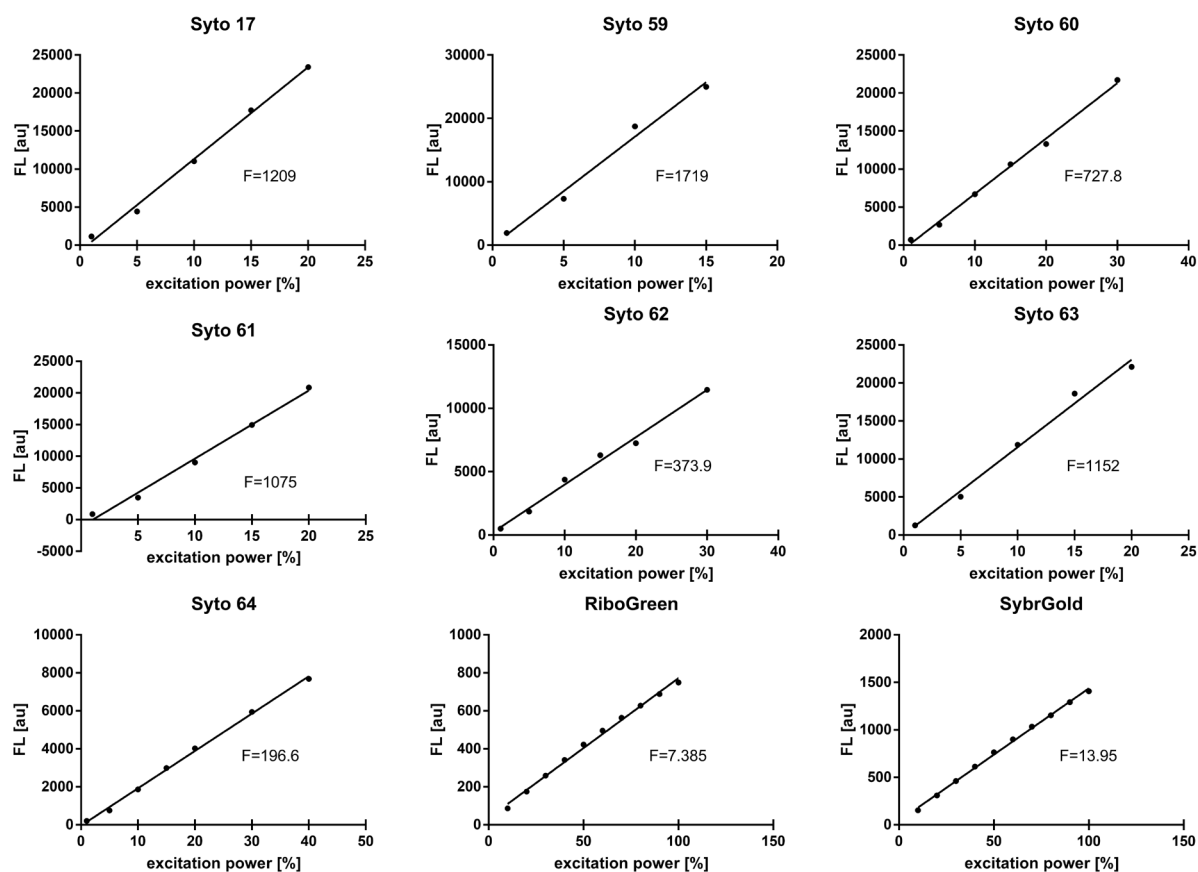

**Figure S1.** Regression plots for dye fluorescence normalization. Each dye (1×) was mixed with 100 nM of MH646 as RNA model oligonucleotide (UCCUCGUUAGUAUAGUGGUGAGUAUCCCCGCCUAUAUC). The initial fluorescence intensity as a function of the excitation power was determined pre-MST with either the NanoBlue laser for SybrGold and RiboGreen or the PicoRed laser for the Syto dyes. Linear regression yielded a slope-derived sensitivity factor (F) for the normalization of fluorescence intensity during structure-activity-relationship experiments.

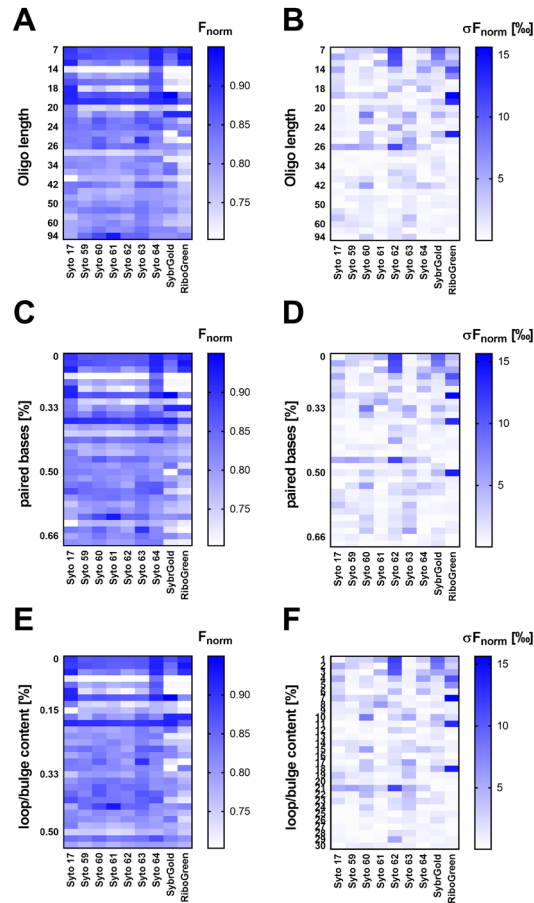

**Figure S2.** Structural RNA-dependent effects on  $F_{\text{norm}}$ . **(A)** Correlation between oligo length and  $F_{\text{norm}}$ . **(B)** Correlation between oligo length and  $\sigma F_{\text{norm}}$ . **(C)** Correlation between hybridized base content and  $F_{\text{norm}}$ . **(D)** Correlation between hybridized base content and  $\sigma F_{\text{norm}}$ . **(E)** Correlation between loop/bulge content and  $F_{\text{norm}}$ . **(F)** Correlation between loop/bulge content and  $\sigma F_{\text{norm}}$ .

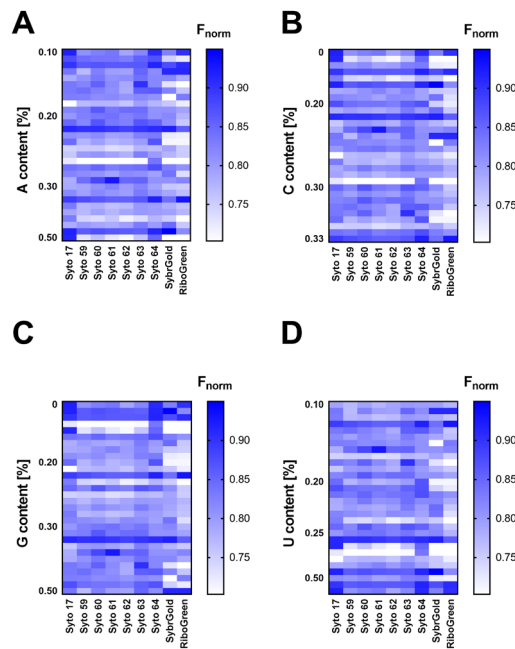

**Figure S3.** RNA sequence-dependent effects on  $F_{\text{norm}}$ . **(A)** Correlation between adenine content and  $F_{\text{norm}}$ . **(B)** Correlation between cytosine content and  $F_{\text{norm}}$ . **(C)** Correlation between guanine content and  $F_{\text{norm}}$ . **(D)** Correlation between uridine content and  $F_{\text{norm}}$ .

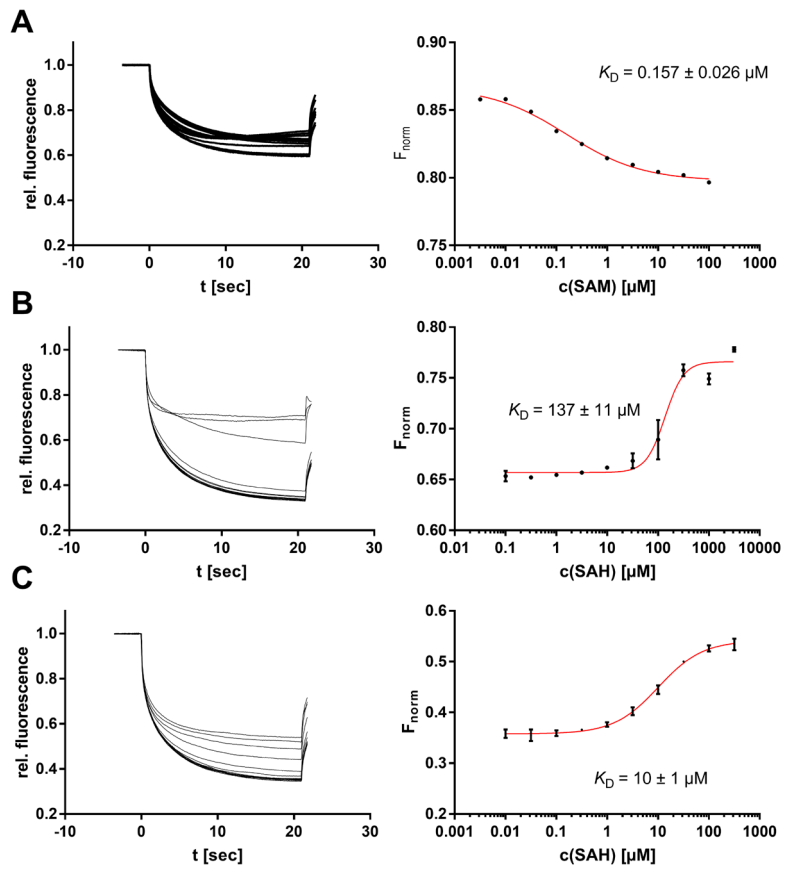

**Figure S4.** Analysis of RNA-ligand interaction by in situ labelling with SybrGold (1 $\times$ ). **(A)** Interaction between SAM-I RS and SAM ( $F_{\text{norm}}$  at 1 s). **(B)** SAM-I RS and SAH ( $F_{\text{norm}}$  at 1 s). **(C)** SAM-VI RS and SAH ( $F_{\text{norm}}$  at 15 s).

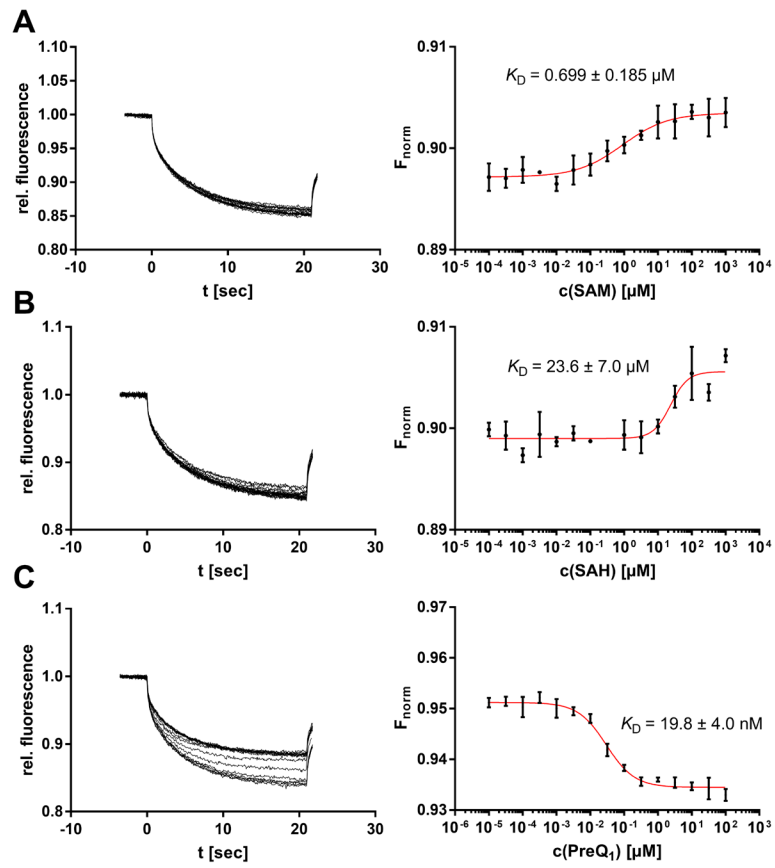

**Figure S5.** Analysis of RNA-ligand interaction by Cy5-labelled RNA-MST **(A)** Interaction between SAM-VI RS and SAM ( $F_{\text{norm}}$  at 5 s). **(B)** SAM-VI RS and SAH ( $F_{\text{norm}}$  at 5 s). **(C)** PreQ<sub>1</sub> RS and PreQ<sub>1</sub> ( $F_{\text{norm}}$  at 1 s).

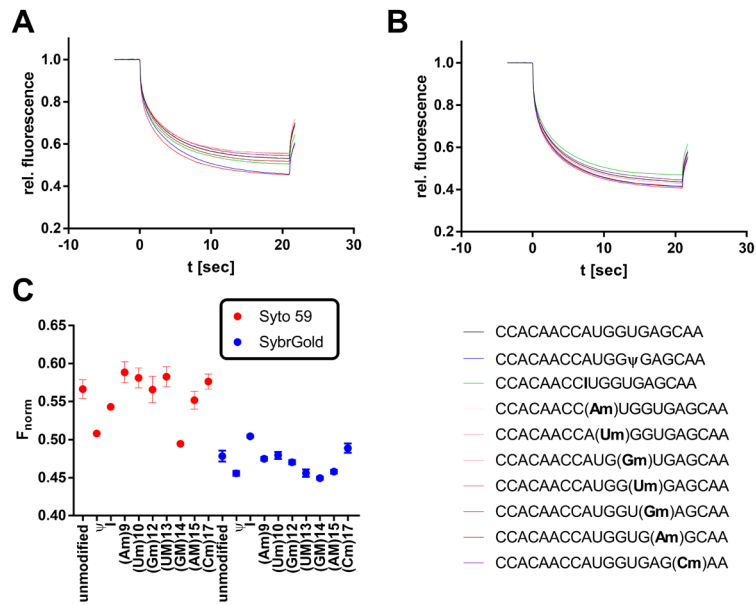

**Figure S6.** Analysis of various modifications of the model oligo CCACAACCAUGGUGAGCAA (100 nM) by MST. **(A)** Thermophoresis curves for the usage of Syto 59 as a reporter dye. **(B)** Thermophoresis curves for the usage of SybrGold as a reporter dye. **(C)** MST response ( $F_{norm}$  at 10 s) of the modified oligos in comparison to their unmodified analogues.

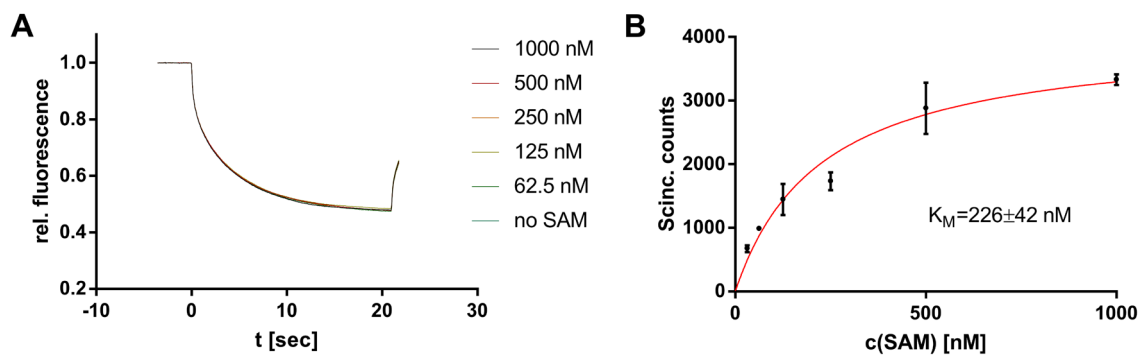

**Figure S7.** Supplementary data for the establishment of the METTL3/14 assay. **(A)** Thermophoresis curves for the METTL3/14 reaction inhibited by the initial addition of SAH (10  $\mu$ M). Enzymatic substrate methylation with varying concentrations of SAM as the cofactor. After 2 h of incubation time, the crude reaction mixture was supplemented with the anti- $m^6A$  antibody and analyzed by SybrGold MST. **(B)** Tritium-based METTL3/14 methyltransferase assay. The Michaelis-Menten plot was derived from radiometric analysis of  $^3H$  incorporation into RNA substrate AACUUAUGUUUGCAUUGGACUUGAGUUA. A  $K_M$  value (226 nM) was calculated by non-linear regression (Michaelis-Menten).



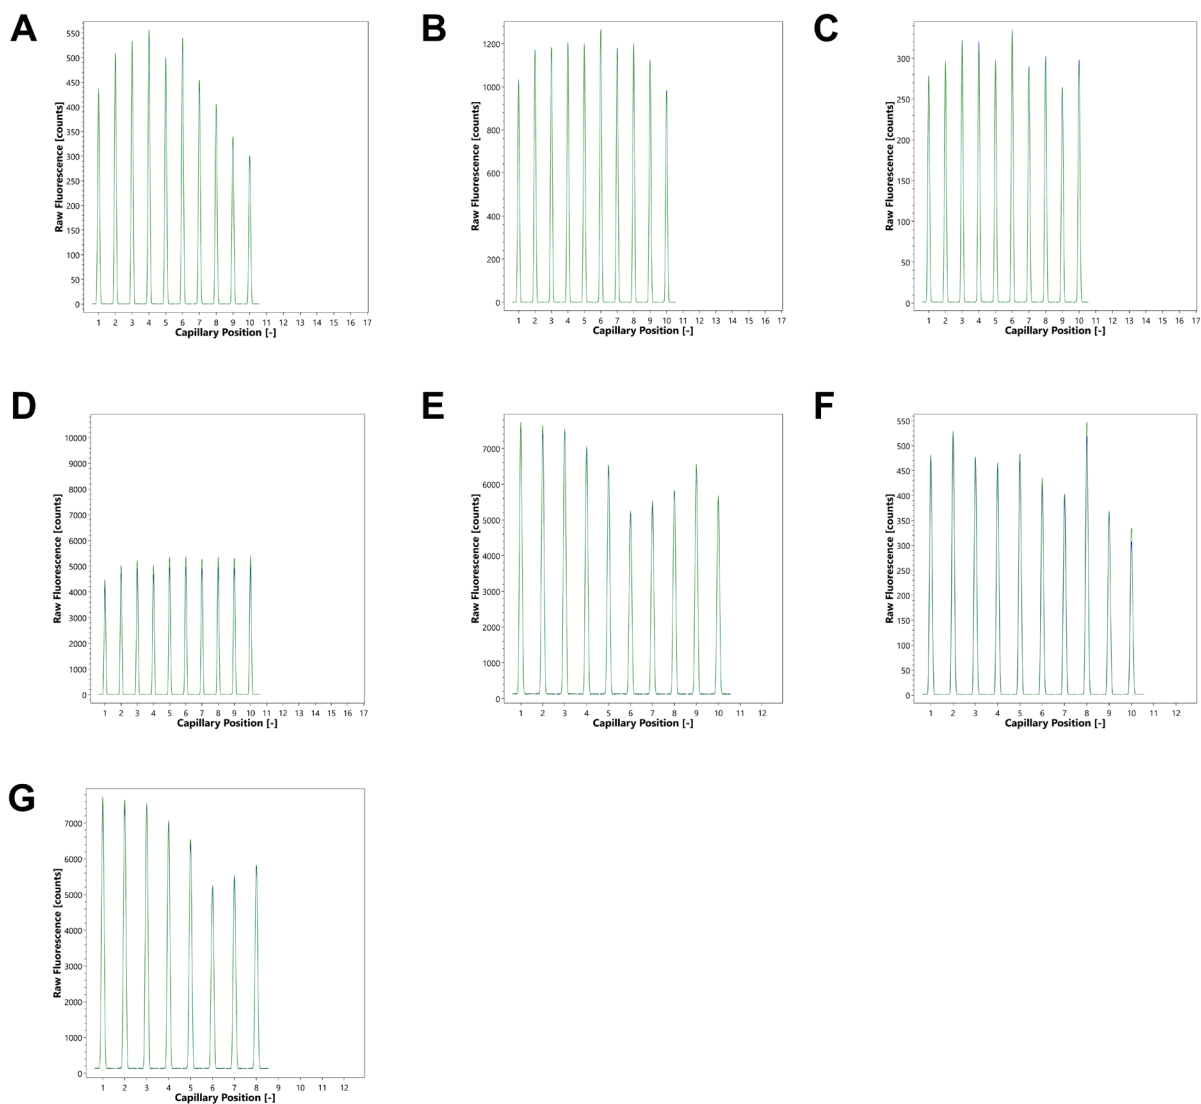

**Figure S8.** Capillary scans of RNA-ligand interaction samples for the assessment of dye displacement by ligand binding. Capillary scans are presented with increasing concentration corresponding to the MST curves in Figure 4 and Figure S4. **(A)** PreQ<sub>1</sub> RS vs. PreQ<sub>1</sub>. **(B)** SAM-I RS vs. SAM. **(C)** SAM-VI RS vs. SAM. **(D)** Fluoride RS vs. potassium fluoride. **(E)** AdoCbl RS vs. adenosyl cobalamin. **(F)** DNMT2 vs. tRNA. **(G)** Neomycin aptamer vs. neomycin.
